# Supplementary material
Source: Springer Nature journal article supplement (https://www.springermedizin.de/resource/supplementary/13550_2011_40_MOESM5_ESM.pdf/9687448)

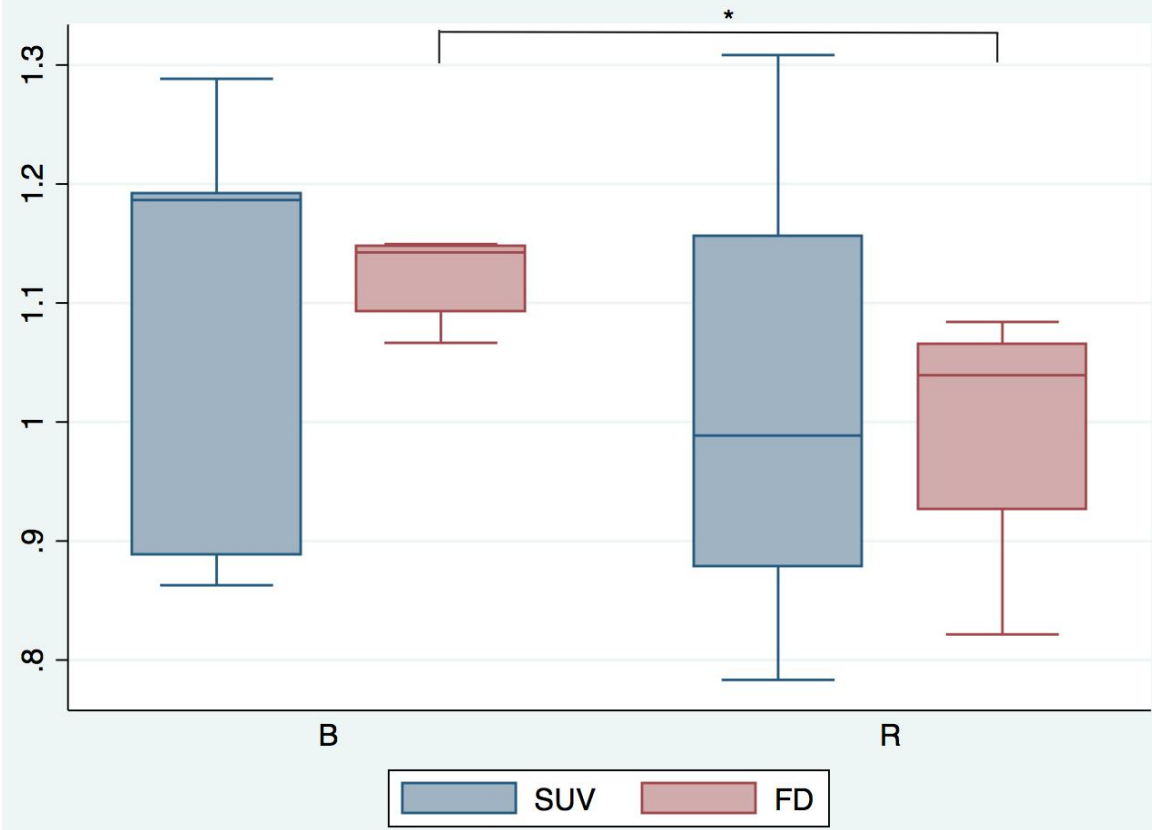

Supplement: MOESM5 [file 9687448]
